# Supplementary material
Source: PubMed Central journal article supplement (PMC3494995)
Supplement: NIHMS392724-supplement-1.pdf [file NIHMS392724-supplement-1.pdf]

**Table S1.** Ion Intensities of Selected<sup>1</sup> Phosphorylated Peptides Detected by Mass Spectrometry, Related to **Figure 1**

| Residue    | Peptide <sup>2</sup>           | Hrr25 alone                           |                      | Coexpression             |                      | Change in sensitivity <sup>4</sup> |
|------------|--------------------------------|---------------------------------------|----------------------|--------------------------|----------------------|------------------------------------|
|            |                                | Phosphorylated Intensity <sup>3</sup> | Unmodified Intensity | Phosphorylated Intensity | Unmodified Intensity |                                    |
| Hrr25 S17  | K.IGS#GSFGDIYHGTNLISGEEVAIK.L  | 3.57E+05                              | 1.53E+07             | 3.34E+04                 | 2.90E+07             | 0.049                              |
| Hrr25 S19  | K.IGSGS#FGDIYHGTNLISGEEVAIK.L  | 2.47E+06                              | 1.53E+07             | 1.68E+05                 | 2.90E+07             | 0.036                              |
| Hrr25 S325 | K.GDLNANSNAASASNS#TDNKS        | 5.20E+04                              | 2.86E+06             | 8.23E+05                 | 4.34E+07             | 1.04                               |
| Hrr25 S330 | K.GDLNANSNAASASNSTDNKS#ETFNK.I | 3.97E+06                              | 6.80E+06             | 7.75E+06                 | 1.65E+07             | 0.804                              |
| Hrr25 S377 | K.QQTILNNAASS#LPEELLNALDK.G    | 5.38E+06                              | 7.15E+06             | 3.37E+05                 | 7.94E+06             | 0.056                              |
| Mam1 S214  | K.ENIEDLTIEIDS#IETNHQK.K       | -                                     | -                    | 1.83E+06                 | 1.41E+06             | -                                  |
|            | R.KENIEDLTIEIDS#IETNHQK.K      | -                                     | -                    | 6.70E+05                 | 6.55E+05             | -                                  |
|            | K.RKENIEDLTIEIDS#IETNHQK.K     | -                                     | -                    | 8.44E+05                 | 2.34E+05             | -                                  |
|            | K.RKENIEDLTIEIDS#IETNHQKK.R    | -                                     | -                    | 1.91E+05 <sup>5</sup>    | 3.28E+04             | -                                  |

<sup>1</sup>Peptides chosen were those in which both the phosphorylated and unmodified peptide were detected in both Hrr25 and coexpressed samples.

<sup>2</sup>Periods (.) indicate trypsin cleavage sites. Pound symbols (#) indicate phosphorylated residue.

<sup>3</sup>Peak intensities listed are those of the (+2) ion unless otherwise noted.

<sup>4</sup>Change in sensitivity = (phosphorylated<sub>coex</sub>/unmodified<sub>coex</sub>)/(phosphorylated<sub>Hrr25</sub>/unmodified<sub>Hrr25</sub>). A number below 1 indicates that detected phosphorylation at this site was reduced when Hrr25 was coexpressed with Mam1.

<sup>5</sup>(+3) ion.

**Table S2.** Molecular Mass Determinations from Sedimentation Equilibrium Centrifugation/ Multi-Angle Light Scattering, Related to **Figure 1**

| Protein/Complex                                                                        | Method <sup>1</sup> | Observed MW (kDa)       | Calculated MW (kDa) <sup>2</sup> | Oligomeric state             | Reference              |
|----------------------------------------------------------------------------------------|---------------------|-------------------------|----------------------------------|------------------------------|------------------------|
| Csm1 full-length                                                                       | AUC                 | 43.2 +/- 0.9            | 43.5                             | 2 Csm1                       | (Corbett et al., 2010) |
| Csm1 <sup>69-190</sup>                                                                 | AUC                 | 29.1 +/- 2.3            | 28.2                             | 2 Csm1                       | (Corbett et al., 2010) |
| Csm1:Lrs4 full-length                                                                  | AUC                 | 172.3 +/- 4.7           | 165.6                            | 4 Csm1:2 Lrs4                | (Corbett et al., 2010) |
| Csm1:Lrs4 <sup>1-102</sup>                                                             | AUC                 | 108.5 +/- 3.0           | 111.0                            | 4 Csm1:2 Lrs4                | (Corbett et al., 2010) |
| Csm1:Mam1 <sup>221-290</sup>                                                           | AUC                 | 50.3 +/- 2.7            | 51.5                             | 2 Csm1:1 Mam1                | this work              |
| Csm1 <sup>69-181</sup> /Mam1 <sup>221-290</sup>                                        | AUC                 | 32.8 +/- 1.6            | 33.9                             | 2 Csm1:1 Mam1                | this work              |
| Hrr25 <sup>1-394</sup> K38R                                                            | SEC-MALS            | 43.6 +/- 1.5            | 45.8                             | 1 Hrr25                      | this work              |
| Hrr25 <sup>1-394</sup> K38R:Mam1 <sup>87-191</sup>                                     | AUC                 | 57.2 +/- 2.8            | 58.6                             | 1 Hrr25:1 Mam1               | this work              |
| Hrr25 <sup>1-494</sup> K38R:Mam1 <sup>87-191</sup>                                     | SEC-MALS            | 69.9 +/- 1.2            | 70.1                             | 1 Hrr25:1 Mam1               | this work              |
| His-Hrr25 <sup>1-394</sup> K38R:<br>Mam1 <sup>87-302</sup> :Csm1:Lrs4 <sup>1-102</sup> | AUC                 | 258 +/- 37 <sup>3</sup> | 258.5                            | 2 Hrr25:2 Mam1:4 Csm1:2 Lrs4 | this work              |

<sup>1</sup> The molecular mass was measured either by equilibrium analytical ultracentrifugation (AUC) or by size exclusion chromatography/multi-angle light scattering (SEC-MALS).

<sup>2</sup> 'Calculated MW' is the expected molecular mass of a complex with the stoichiometry listed in 'Oligomeric State'.

<sup>3</sup> Data showed evidence of aggregation or self-association (non-linearity of  $r^2$  vs.  $\log(A_{280})$  plot, especially at low speed), so curves were truncated to minimize the impact of aggregated species on the molecular weight estimate.

**Table S3.** Data Collection and Refinement Statistics, Related to **Figure 2**

| <b>Data collection</b>                                 | <b>Csm1:Mam1<sup>221-290</sup><br/>Native</b> | <b>Csm1:Mam1<sup>221-290</sup><br/>F243M S-anomalous</b> |
|--------------------------------------------------------|-----------------------------------------------|----------------------------------------------------------|
| Resolution (Å)                                         | 50 – 3.05                                     | 50 – 4.4                                                 |
| Wavelength (Å)                                         | 0.9795                                        | 1.771                                                    |
| Space Group                                            | P3 <sub>1</sub> 21                            | P3 <sub>1</sub> 21                                       |
| Unit Cell Dimensions (a, b, c) Å                       | 101.85, 101.85,<br>225.08                     | 101.89, 101.89,<br>224.72                                |
| Unit Cell Angles (α,β,γ) °                             | 90, 90, 120                                   | 90, 90, 120                                              |
| <i>I</i> /σ (last shell)                               | 5.5 (1.4)                                     | 3.5 (1.3)                                                |
| <sup>1</sup> <i>R</i> <sub>sym</sub> (last shell)      | 0.091 (0.721)                                 | 0.216 (1.196)                                            |
| <sup>2</sup> <i>R</i> <sub>meas</sub> (last shell)     | 0.125 (0.991)                                 | 0.263 (1.448)                                            |
| Completeness (last shell) %                            | 98.6 (99.7)                                   | 99.6 (100.0)                                             |
| Number of reflections                                  | 60821                                         | 50297                                                    |
| <i>unique</i>                                          | 26073                                         | 9017                                                     |
| Multiplicity (last shell)                              | 2.3 (2.4)                                     | 5.6 (5.9)                                                |
| <b>Refinement</b>                                      |                                               |                                                          |
| Resolution (Å)                                         | 50 – 3.05                                     |                                                          |
| No. of reflections                                     | 26017                                         |                                                          |
| <i>working</i>                                         | 24705                                         |                                                          |
| <i>free</i>                                            | 1312                                          |                                                          |
| <sup>3</sup> <i>R</i> <sub>work</sub> (last shell) (%) | 21.32 (36.77)                                 |                                                          |
| <sup>3</sup> <i>R</i> <sub>free</sub> (last shell) (%) | 26.02 (39.13)                                 |                                                          |
| <b>Structure/Stereochemistry</b>                       |                                               |                                                          |
| No. of atoms                                           | 2829                                          |                                                          |
| r.m.s.d. bond lengths (Å)                              | 0.010                                         |                                                          |
| r.m.s.d. bond angles (°)                               | 1.394                                         |                                                          |
| Ramachandran favored/allowed (%)                       | 98.2%/100.0%                                  |                                                          |
| <sup>4</sup> MolProbity score/percentile               | 2.77/87 <sup>th</sup>                         |                                                          |
| <sup>5</sup> Protein Data Bank ID                      | 4EMC                                          |                                                          |

<sup>1</sup> $R_{\text{sym}} = \frac{\sum_j |I_j - \langle I \rangle|}{\sum_j I_j}$ , where  $I_j$  is the intensity measurement for reflection  $j$  and  $\langle I \rangle$  is the mean intensity for multiply recorded reflections.

<sup>2</sup> $R_{\text{meas}} = \sum_h \left[ \sqrt{\frac{n}{n-1}} \frac{\sum_j [I_{hj} - \langle I_h \rangle]}{\sum_{hj} \langle I_h \rangle} \right]$

where  $I_{hj}$  is a single intensity measurement for reflection  $h$ ,  $\langle I_h \rangle$  is the average intensity measurement for multiply recorded reflections, and  $n$  is the number of observations of reflection  $h$ .

<sup>3</sup> $R_{\text{work, free}} = \frac{\sum [ |F_{\text{obs}}| - |F_{\text{calc}}| ]}{\sum |F_{\text{obs}}|}$ , where the working and free  $R$ -factors are calculated using the working and free reflection sets, respectively.

<sup>4</sup>Calculated by the MolProbity structure validation server (<http://molprobity.biochem.duke.edu>).

<sup>5</sup>Coordinates and structure factors deposited at the Protein Data Bank (<http://www.pdb.org>).
